# Supplementary material for: Microwave roasting of blast furnace slag for carbon dioxide mineralization and energy analysis
Source: Royal Society of Chemistry journal article supplement (doi:10.1039/d0ra02846k), 2020-01-01
Supplement: d0ra02846k1.pdf [file d0ra02846k1.pdf]

## Supplementary material

### Microwave Roasting of Blast Furnace Slag for Carbon Dioxide Mineralization and Energy Analysis

*Zike Han<sup>a</sup>, Jianqiu Gao<sup>a</sup>, Xizhi Yuan<sup>a</sup>, Yanjun Zhong<sup>a</sup>, Xiaodong Ma<sup>b</sup>, Zhiyuan Chen<sup>c</sup>,*

*Dongmei Luo<sup>a</sup>, Ye Wang<sup>a1</sup>*

a. School of Chemical Engineering, Sichuan University, Chengdu 610065, P.R. China

b. School of Chemical Engineering, University of Queensland, Brisbane, Australia

c. Department of Materials Science and Engineering, Delft University of Technology,

The Netherland

---

<sup>1</sup> Ye Wang, Associate professor in Sichuan University, Department of Chemical Engineering, Sichuan University, No.24 South Section 1, Yihuan Road, Chengdu, China, 610065.

wangye@scu.edu.cn.

### Formula S1. Calculation of CO<sub>2</sub> capture potential

The capture potential of carbon dioxide is closely related to the content of calcium and magnesium in raw materials. The capture potential of a certain raw material can be calculated by the following reaction formula:

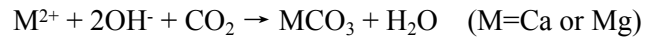

Amount of M in one ton Ti-bearing blast furnace slag:

$$\text{Ca: } 1000\text{kg} \times 18.24\% \times 1/40.08 = 4.551\text{kmol}$$

$$\text{Mg: } 1000\text{kg} \times 4.07\% \times 1/24.30 = 1.675\text{kmol}$$

The capture potential of carbon dioxide:

$$(1.67 \quad \text{kmol} + \quad 4.55 \quad \text{kmol}) \times 44.01 = \quad 274.0\text{kg}$$

| Reaction                                                                                    | Conversion rate                      |
|---------------------------------------------------------------------------------------------|--------------------------------------|
| $MO + (NH_4)_2SO_4 = MSO_4 + 2NH_3 + H_2O$ ( $M = Ca, Mg, \dots$ )                          | 93.3%<br>(Sulfation ratios<br>of Ca) |
| $M_2O_3 + 3(NH_4)_2SO_4 = M_2(SO_4)_3 + 6NH_3 + 3H_2O$ ( $M = Al, Fe, \dots$ )              |                                      |
| $MO_2 + (NH_4)_2SO_4 = MOSO_4 + 2NH_3 + H_2O$ ( $M = Ti, \dots$ )                           |                                      |
| $(NH_4)_2SO_4 = NH_4HSO_4 + NH_3$                                                           |                                      |
| $2NH_3 + CO_2 + H_2O = (NH_4)_2CO_3$                                                        | 100%                                 |
| $TiOSO_4 + H_2O = TiO_2 \downarrow + H_2SO_4$                                               | 95.7%                                |
| $Al_2(SO_4)_3 + 6NH_3 \cdot H_2O = Al(OH)_3 + 3(NH_4)_2SO_4$                                | 99.7%                                |
| $MgSO_4 + 2(NH_4)_2CO_3 + 4H_2O = (NH_4)_2Mg(CO_3)_2 \cdot 4H_2O \downarrow + (NH_4)_2SO_4$ | 91%                                  |
| $CaSO_4 + (NH_4)_2CO_3 = CaCO_3 \downarrow + (NH_4)_2SO_4$                                  | 100%                                 |
| $CaSO_4 + (NH_4)_2CO_3 = CaCO_3 \downarrow + (NH_4)_2SO_4$                                  | 99.7%                                |
| $(NH_4)_2Mg(CO_3)_2 \cdot 4H_2O = MgCO_3 + NH_3 + CO_2 + 4H_2O$                             | 100%                                 |

**Table S1. Conversion rate of main reactions in material balance**

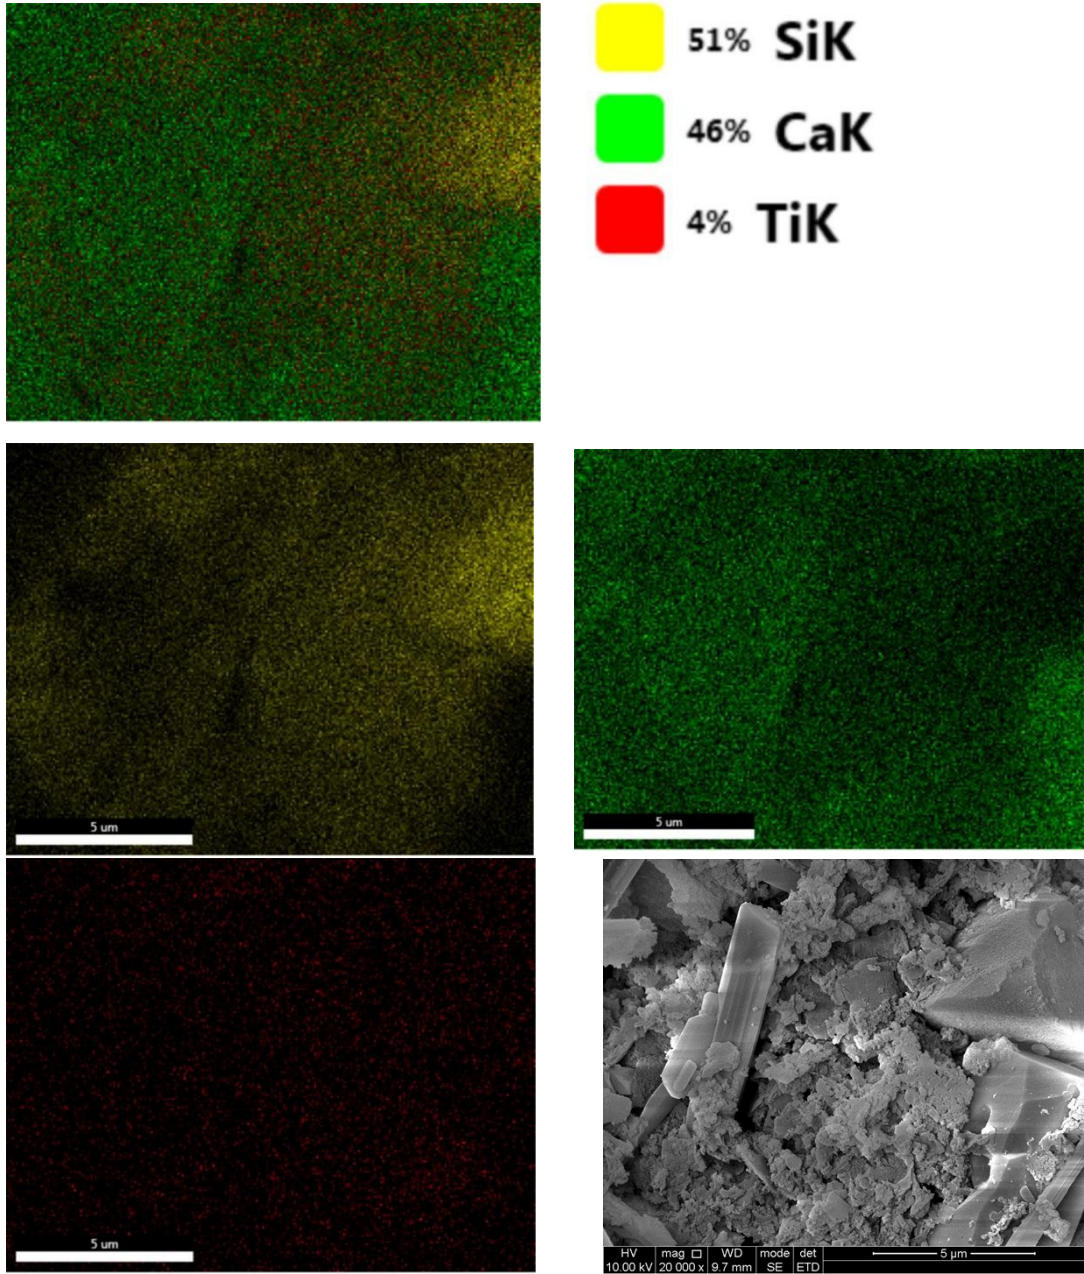

Figure S1. EDS analysis results of leaching residue

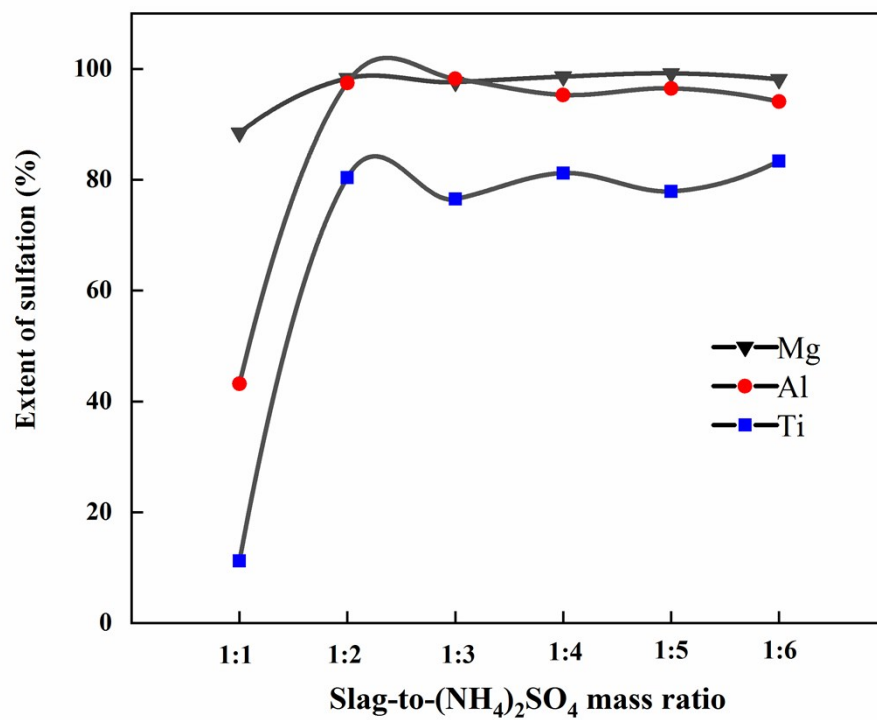

Figure S2. The effect of slag-to-(NH<sub>4</sub>)<sub>2</sub>SO<sub>4</sub> mass ratio on the sulfation of Mg, Al and Ti

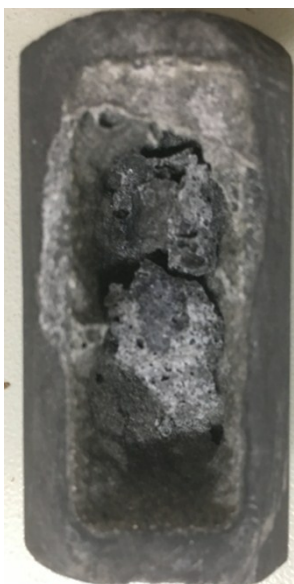

**0min**

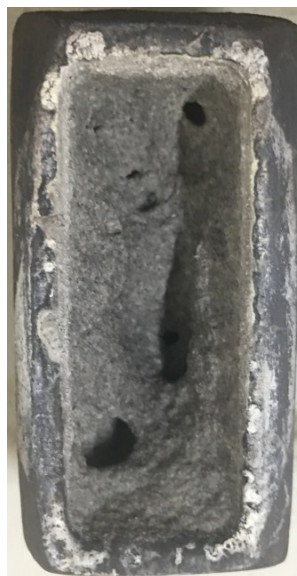

**2min-(1)**

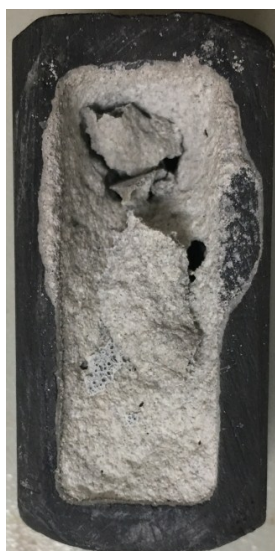

**4min (TiO<sub>2</sub> generated)**

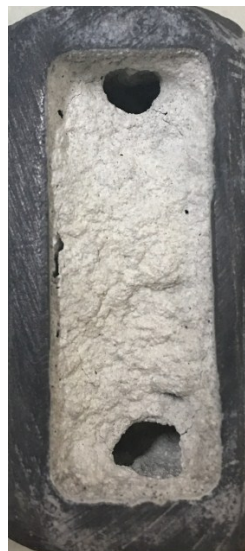

**10min (TiO<sub>2</sub> generated)**

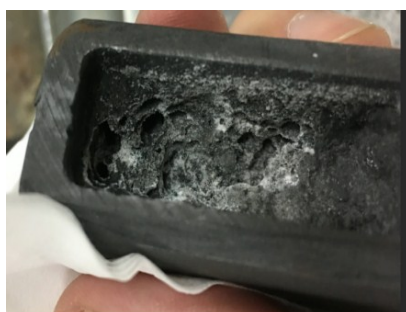

**2min-(2)**

**Figure S3. Photos of products at different holding times**
